# Supplementary material
Source: Springer Nature journal article supplement (https://www.springermedizin.de/resource/supplementary/13075_2010_2977_MOESM2_ESM.pdf/9693478)
Supplement: MOESM2 [file 9693478]

# SUPPLEMENTS

## Entry Question

1. Have you ever used herbs, mixtures, or other supplements that are taken by mouth specifically for your arthritis or joint symptoms? If you aren't sure, look ahead to the list below and then come back to this question.

No Please turn to the **purple** section, **Rubs, Lotions, Liniments, Creams and Oils**, on **page 9** to continue the booklet.

Yes Please answer the questions below about supplements you may take by mouth.

| II.                                 | a. Have you <b>EVER</b> used this supplement for your arthritis or joint symptoms? | b. Are you <b>CURRENTLY</b> using this supplement for your arthritis or joint symptoms? If yes, for how long? | c. Do you plan to <b>CONTINUE</b> to use this supplement for your arthritis or joint symptoms? |
|-------------------------------------|------------------------------------------------------------------------------------|---------------------------------------------------------------------------------------------------------------|------------------------------------------------------------------------------------------------|
| Devil's claw                        | <input type="checkbox"/> No <input type="checkbox"/> Yes                           | <input type="checkbox"/> No <input type="checkbox"/> Yes<br>_____ (number of months)                          | <input type="checkbox"/> No <input type="checkbox"/> Yes                                       |
| Eucalyptus                          | <input type="checkbox"/> No <input type="checkbox"/> Yes                           | <input type="checkbox"/> No <input type="checkbox"/> Yes<br>_____ (number of months)                          | <input type="checkbox"/> No <input type="checkbox"/> Yes                                       |
| Fish oil and/or omega-3 fatty acids | <input type="checkbox"/> No <input type="checkbox"/> Yes                           | <input type="checkbox"/> No <input type="checkbox"/> Yes<br>_____ (number of months)                          | <input type="checkbox"/> No <input type="checkbox"/> Yes                                       |
| Flaxseed oil                        | <input type="checkbox"/> No <input type="checkbox"/> Yes                           | <input type="checkbox"/> No <input type="checkbox"/> Yes<br>_____ (number of months)                          | <input type="checkbox"/> No <input type="checkbox"/> Yes                                       |
| Garlic                              | <input type="checkbox"/> No <input type="checkbox"/> Yes                           | <input type="checkbox"/> No <input type="checkbox"/> Yes<br>_____ (number of months)                          | <input type="checkbox"/> No <input type="checkbox"/> Yes                                       |
| Gelatin or Certo in grape juice     | <input type="checkbox"/> No <input type="checkbox"/> Yes                           | <input type="checkbox"/> No <input type="checkbox"/> Yes<br>_____ (number of months)                          | <input type="checkbox"/> No <input type="checkbox"/> Yes                                       |
| Ginger                              | <input type="checkbox"/> No <input type="checkbox"/> Yes                           | <input type="checkbox"/> No <input type="checkbox"/> Yes<br>_____ (number of months)                          | <input type="checkbox"/> No <input type="checkbox"/> Yes                                       |
| Glucosamine                         | <input type="checkbox"/> No <input type="checkbox"/> Yes                           | <input type="checkbox"/> No <input type="checkbox"/> Yes<br>_____ (number of months)                          | <input type="checkbox"/> No <input type="checkbox"/> Yes                                       |
